# Supplementary material
Source: ML conference proceedings conference paper supplement (https://openreview.net/forum?id=HlWLLdUocx5)

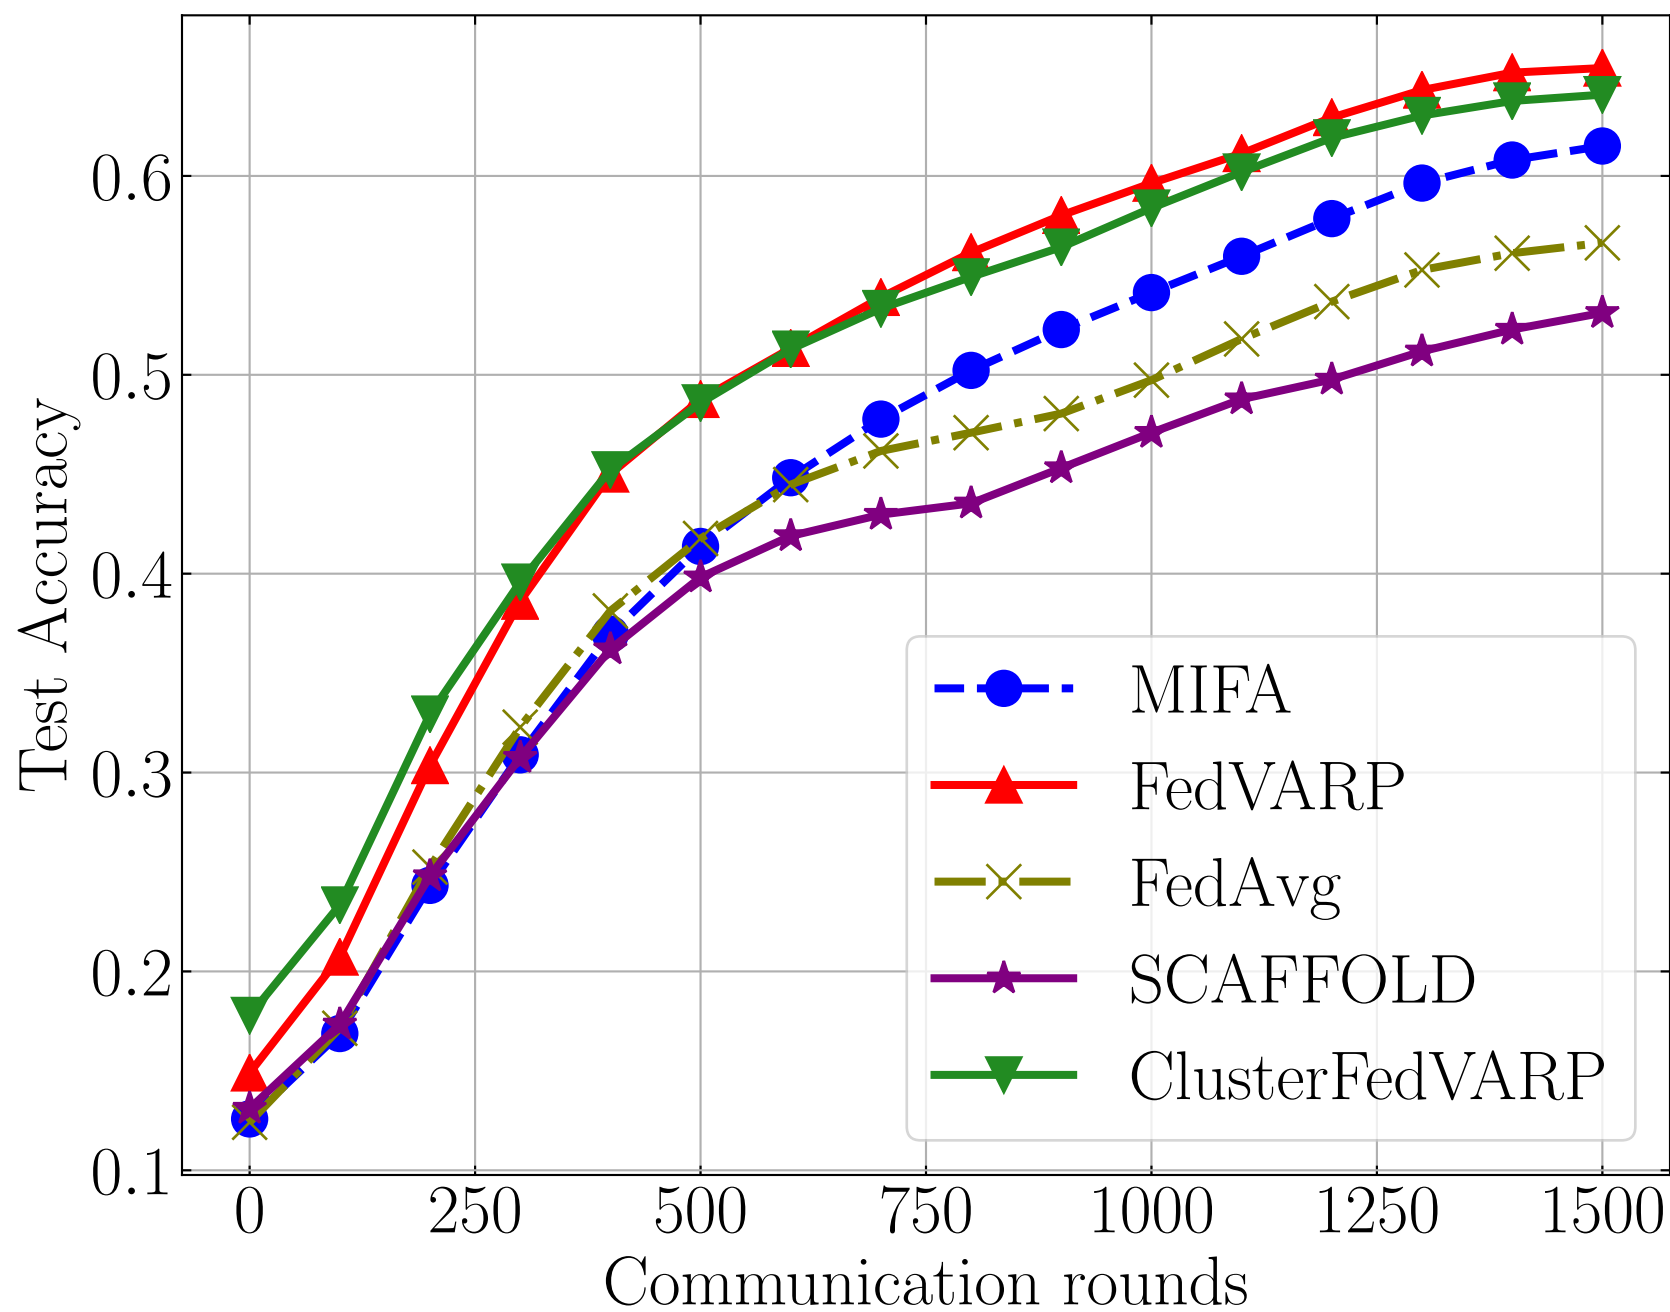

Supplement: supplementary_material [file attachment]

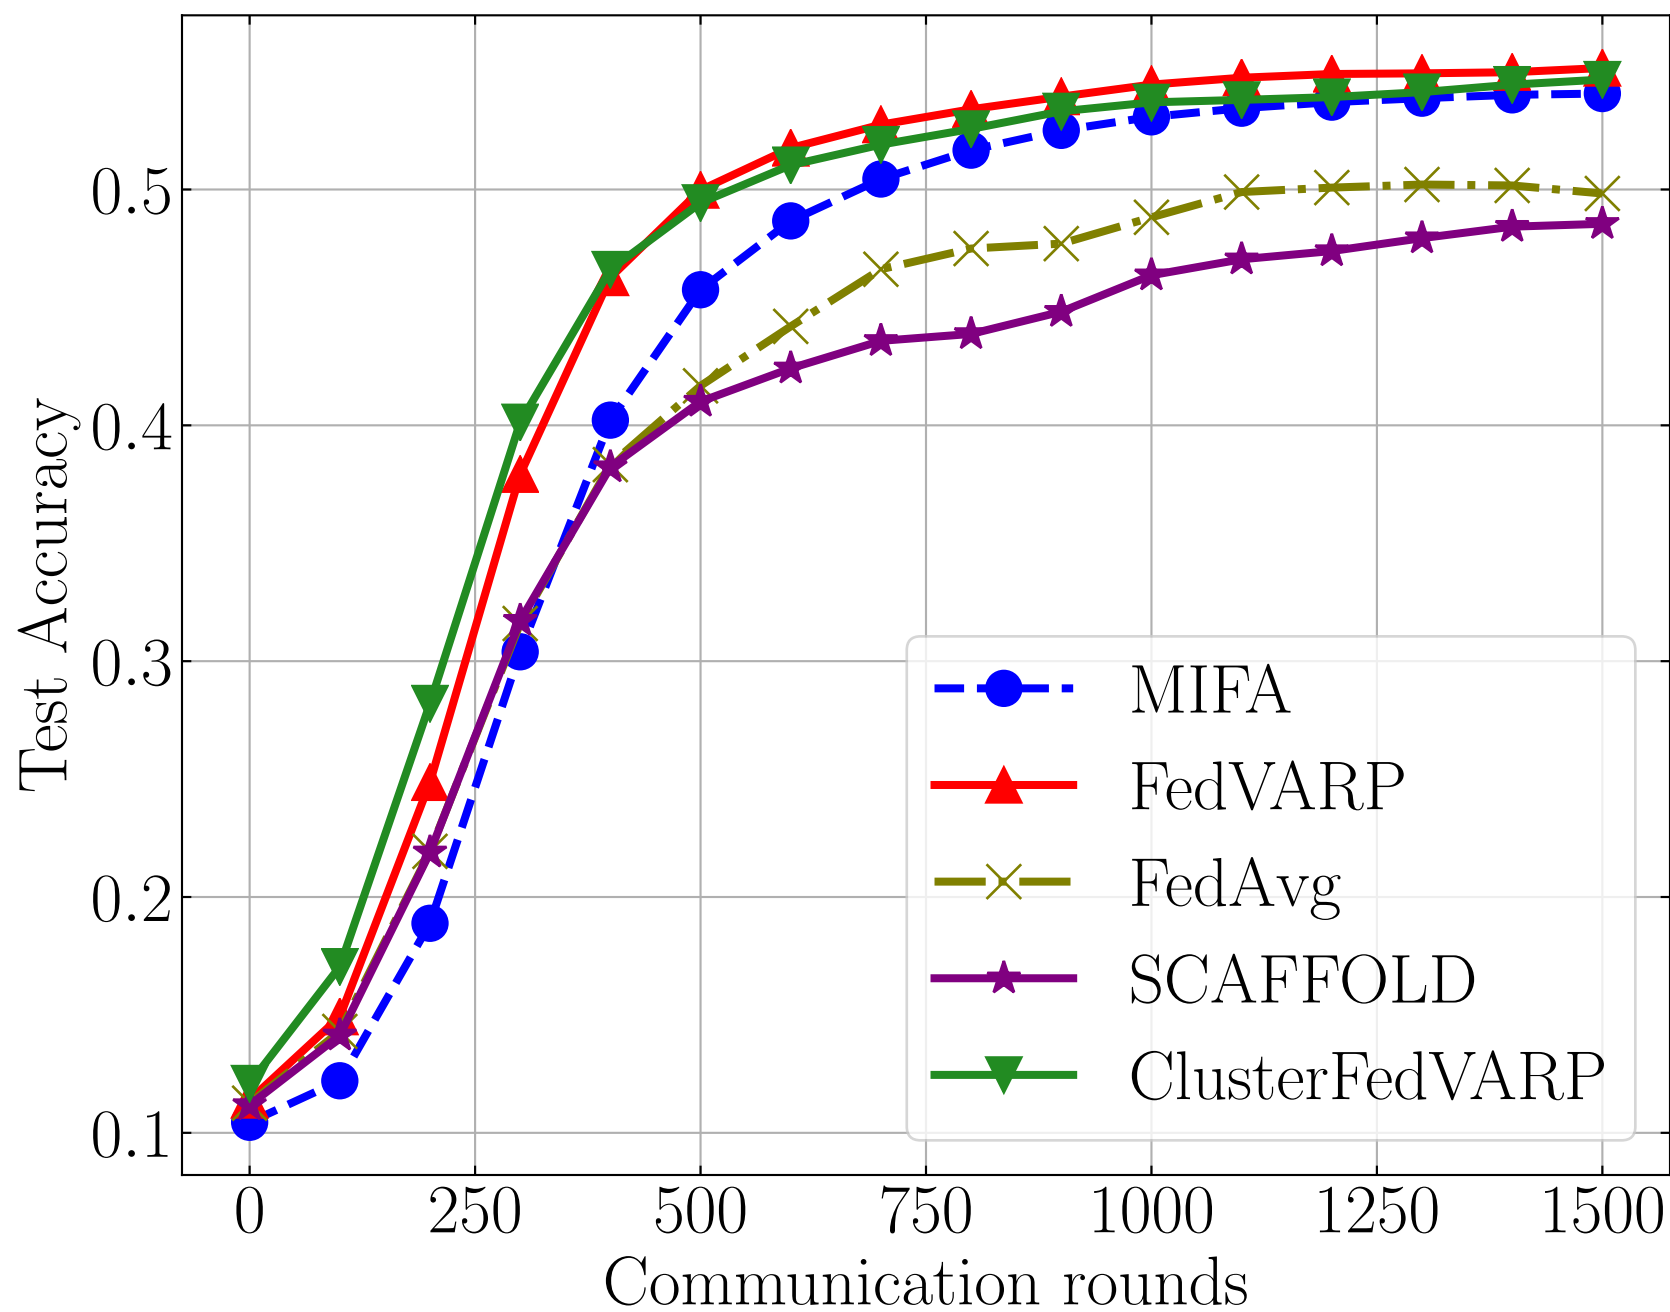

Supplement: supplementary_material [file attachment]

CIFAR-10 on LeNet-5

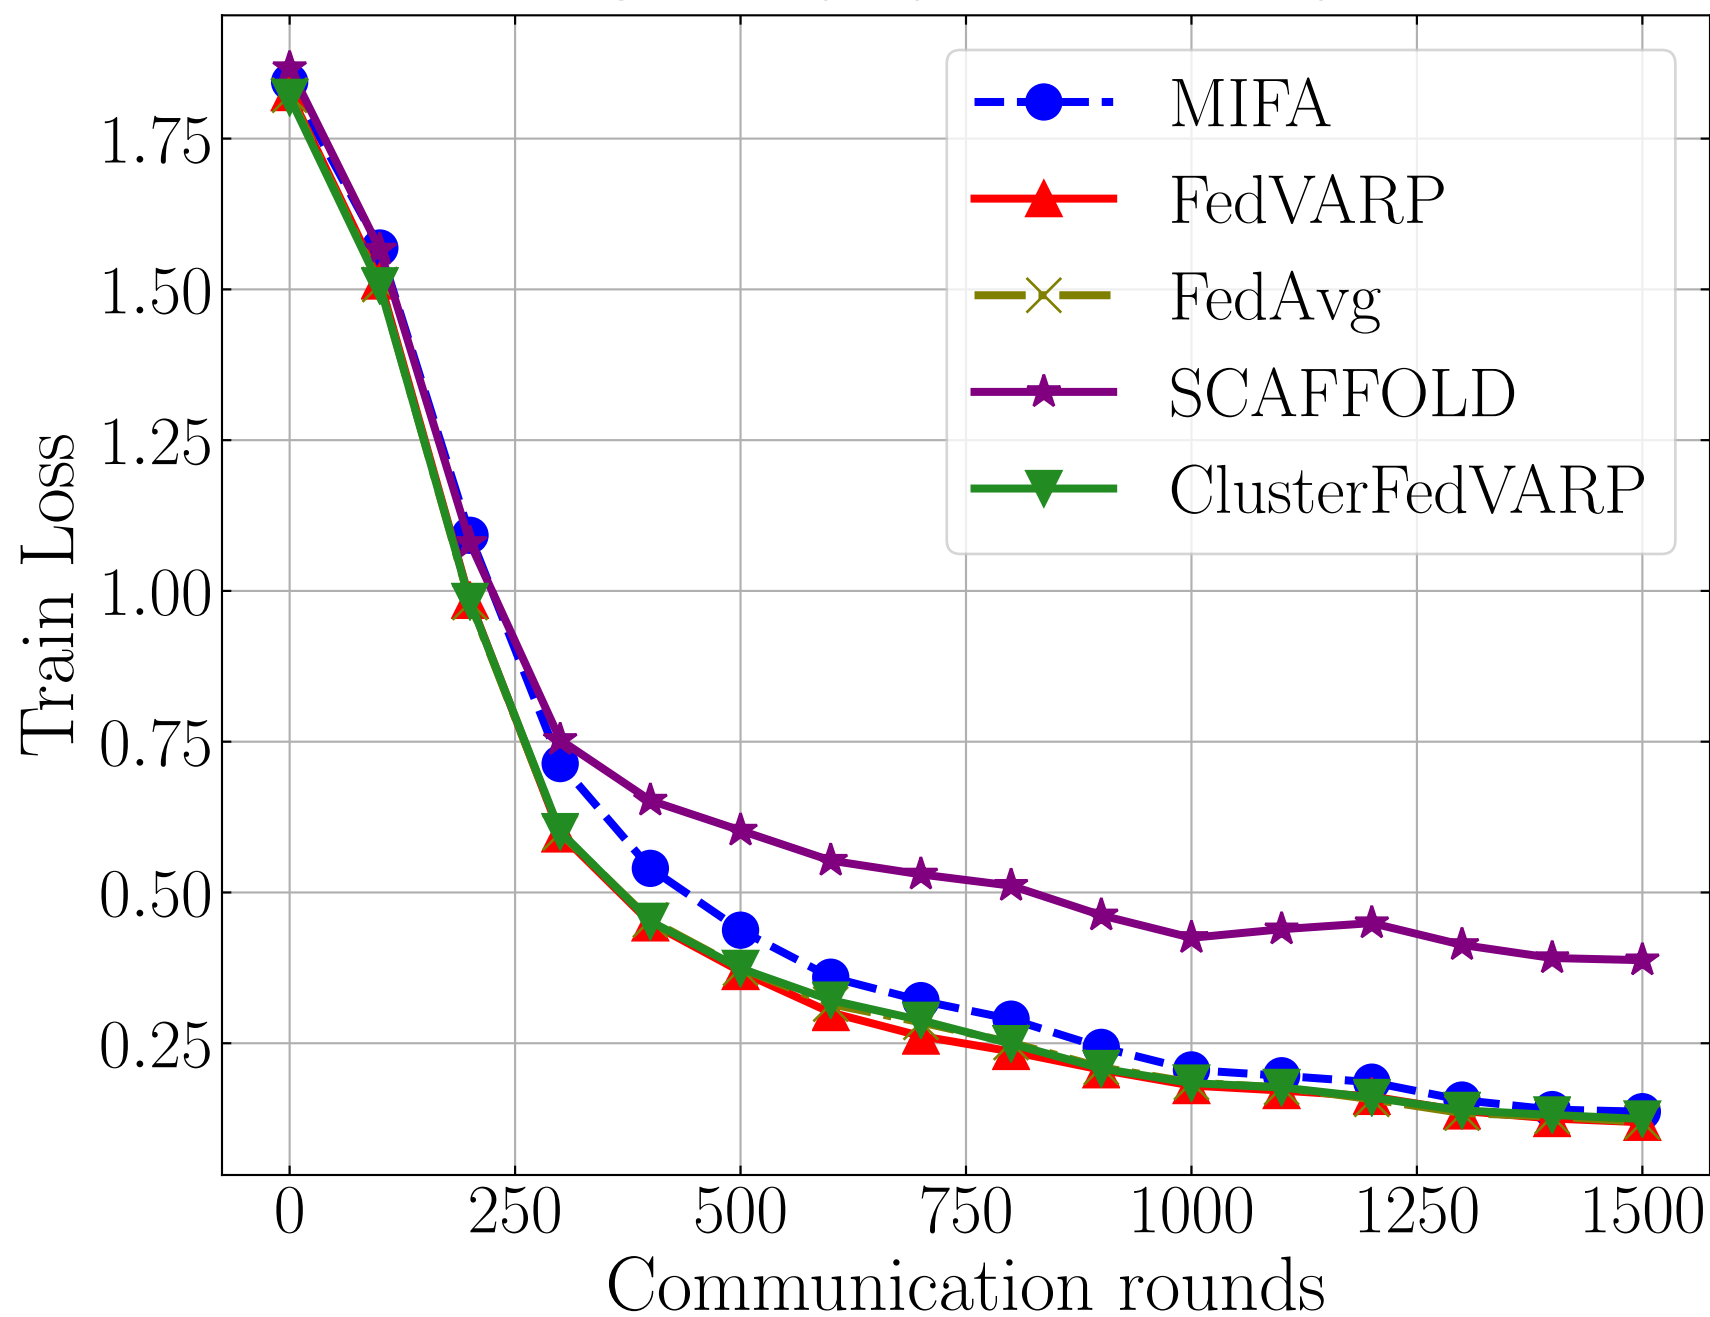

Supplement: supplementary_material [file attachment]

# Shakespeare on RNN

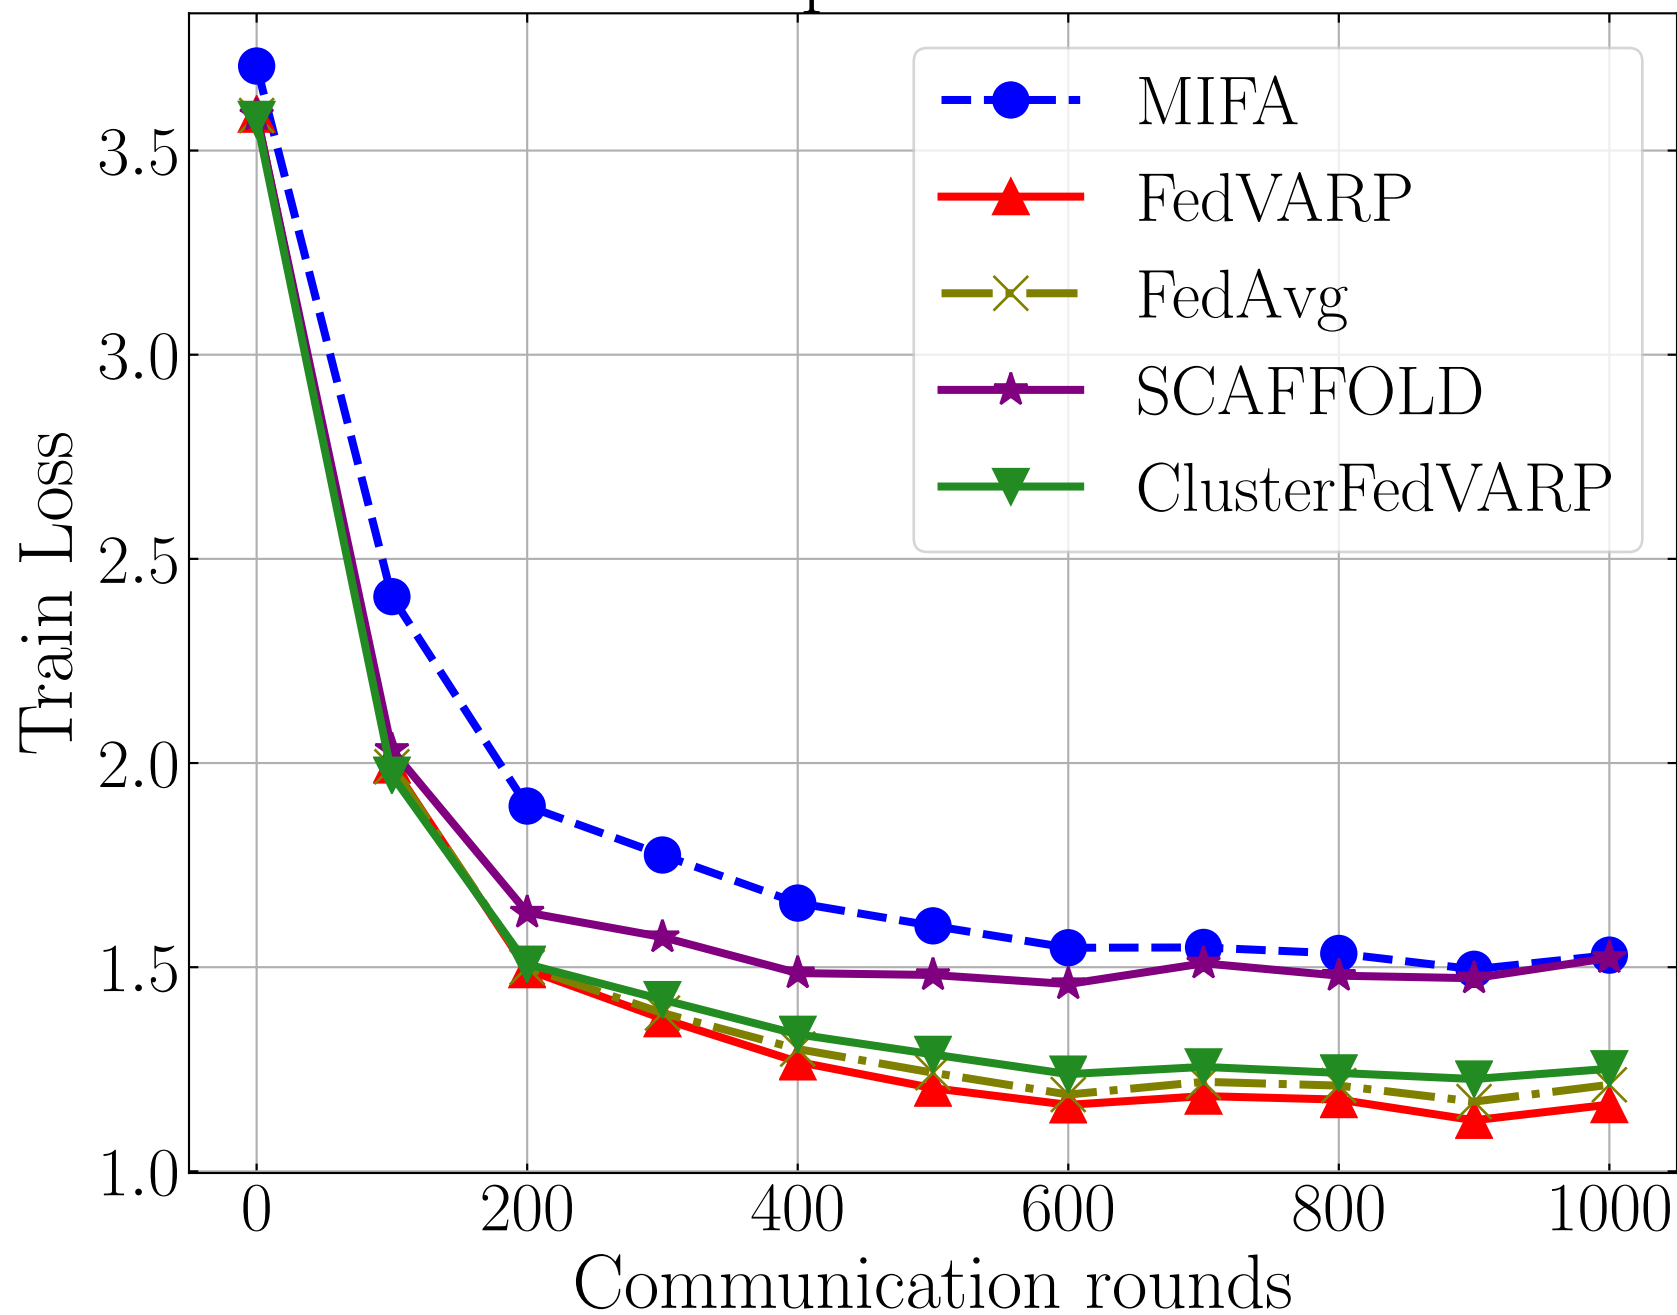

Supplement: supplementary_material [file attachment]

# CIFAR-10 on ResNet-18

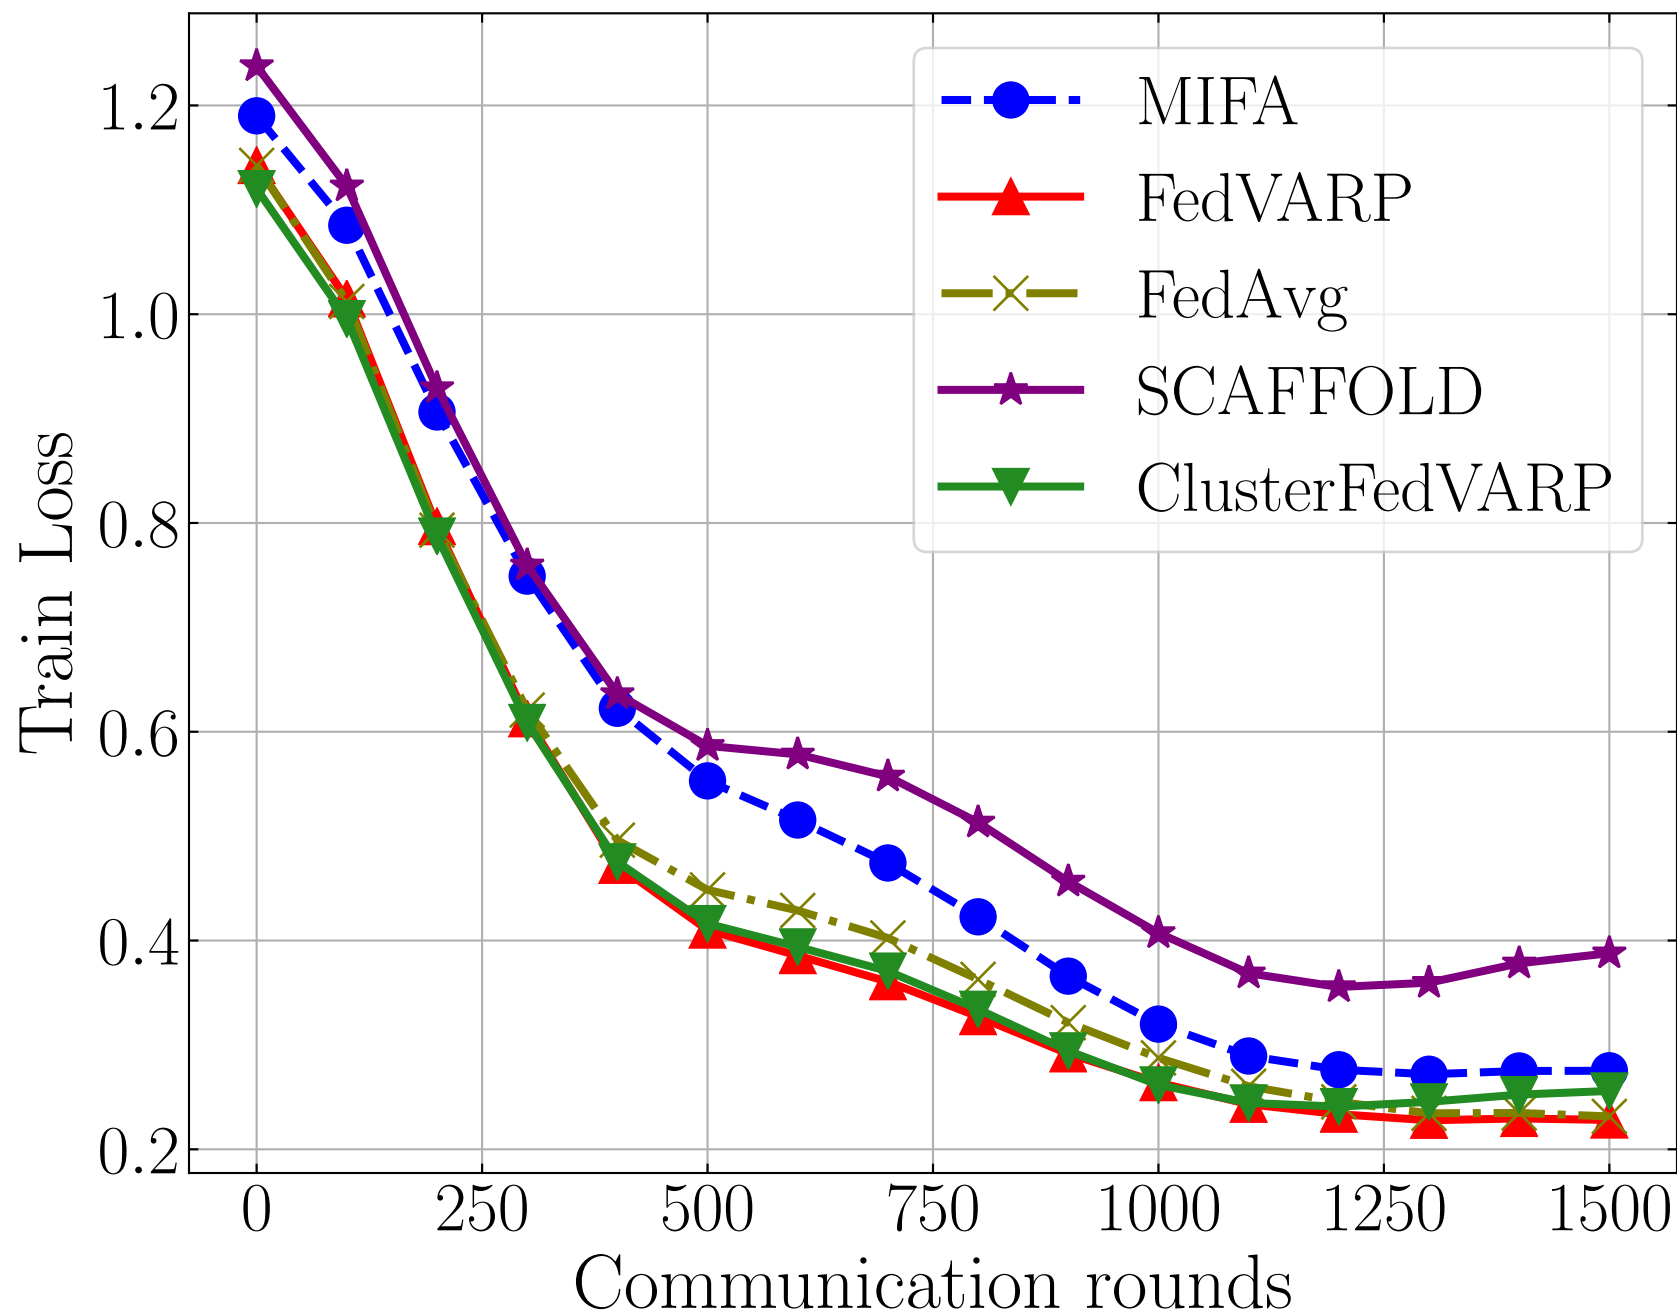

Supplement: supplementary_material [file attachment]

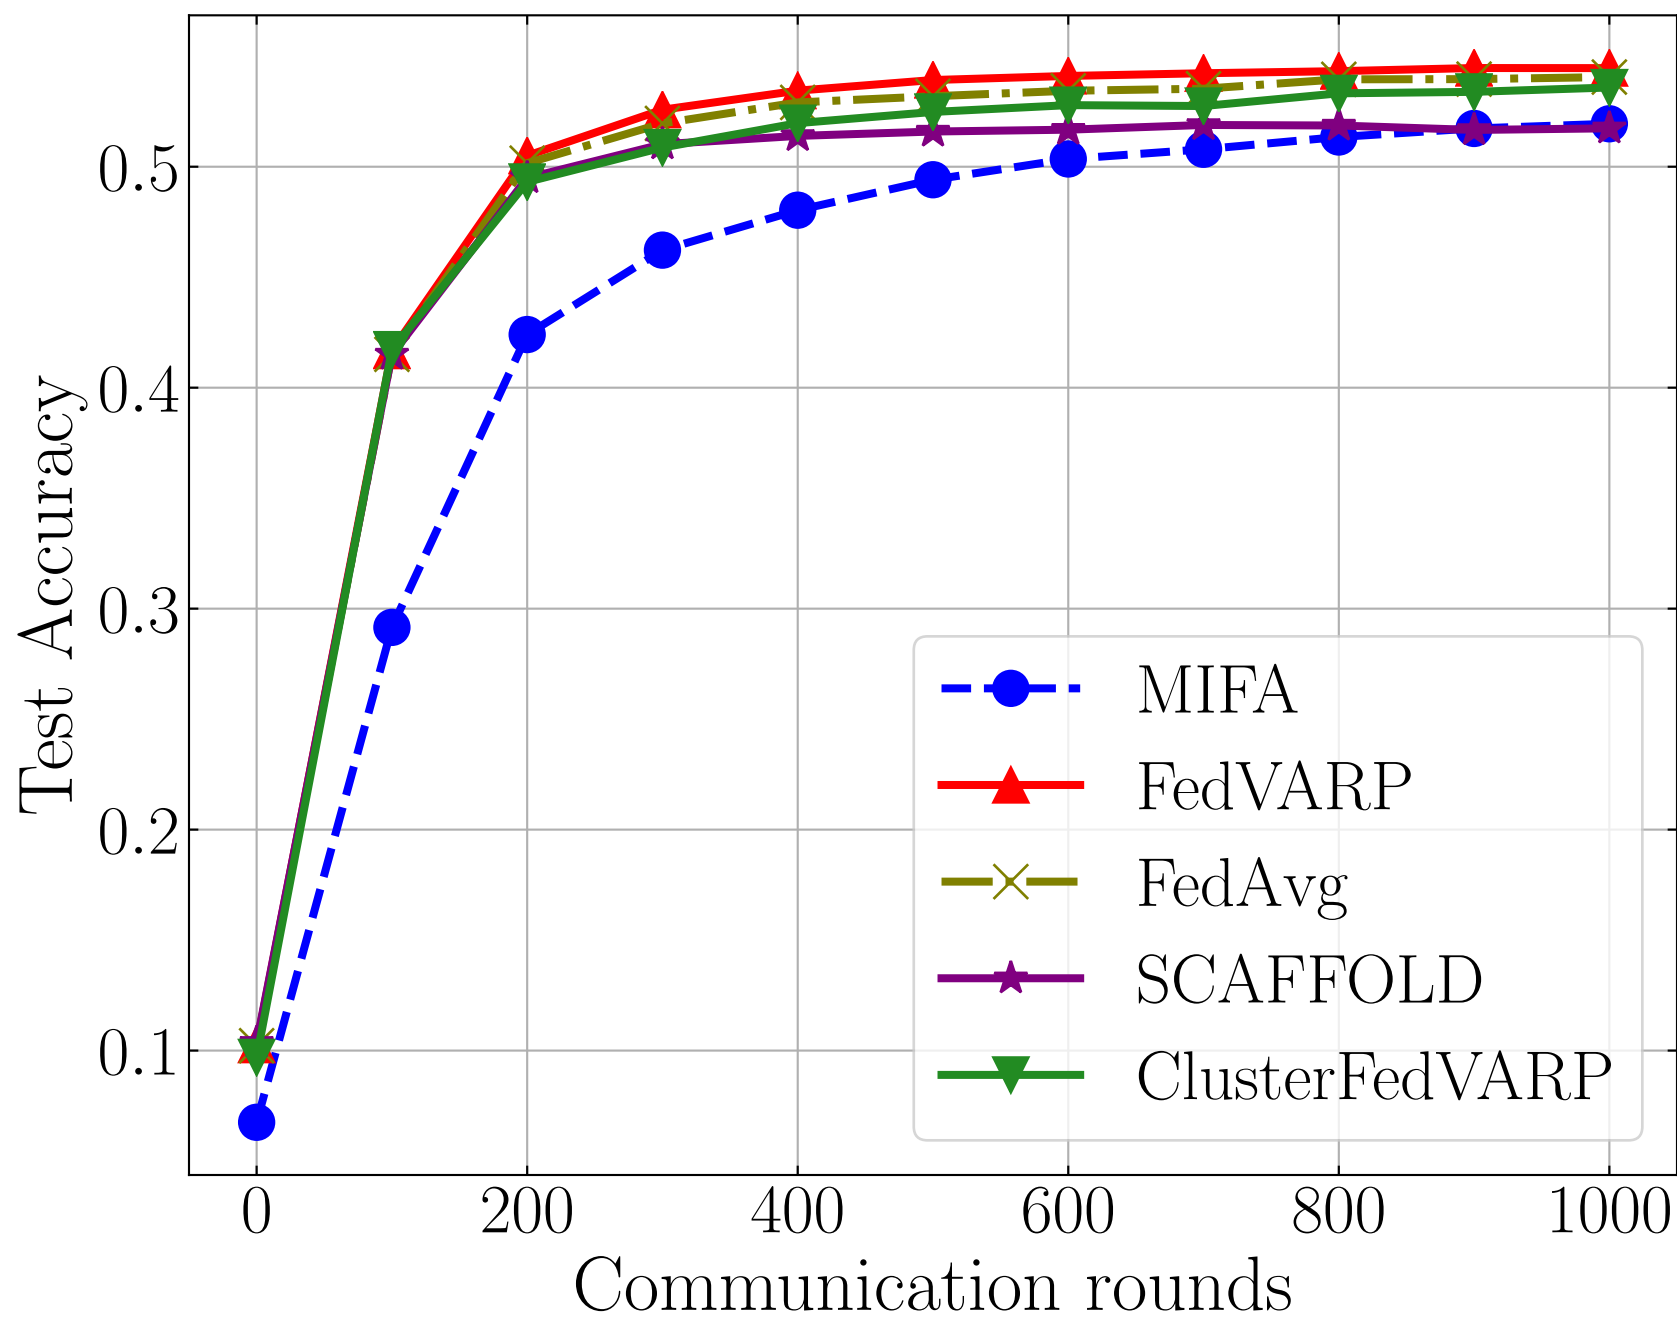

Supplement: supplementary_material [file attachment]

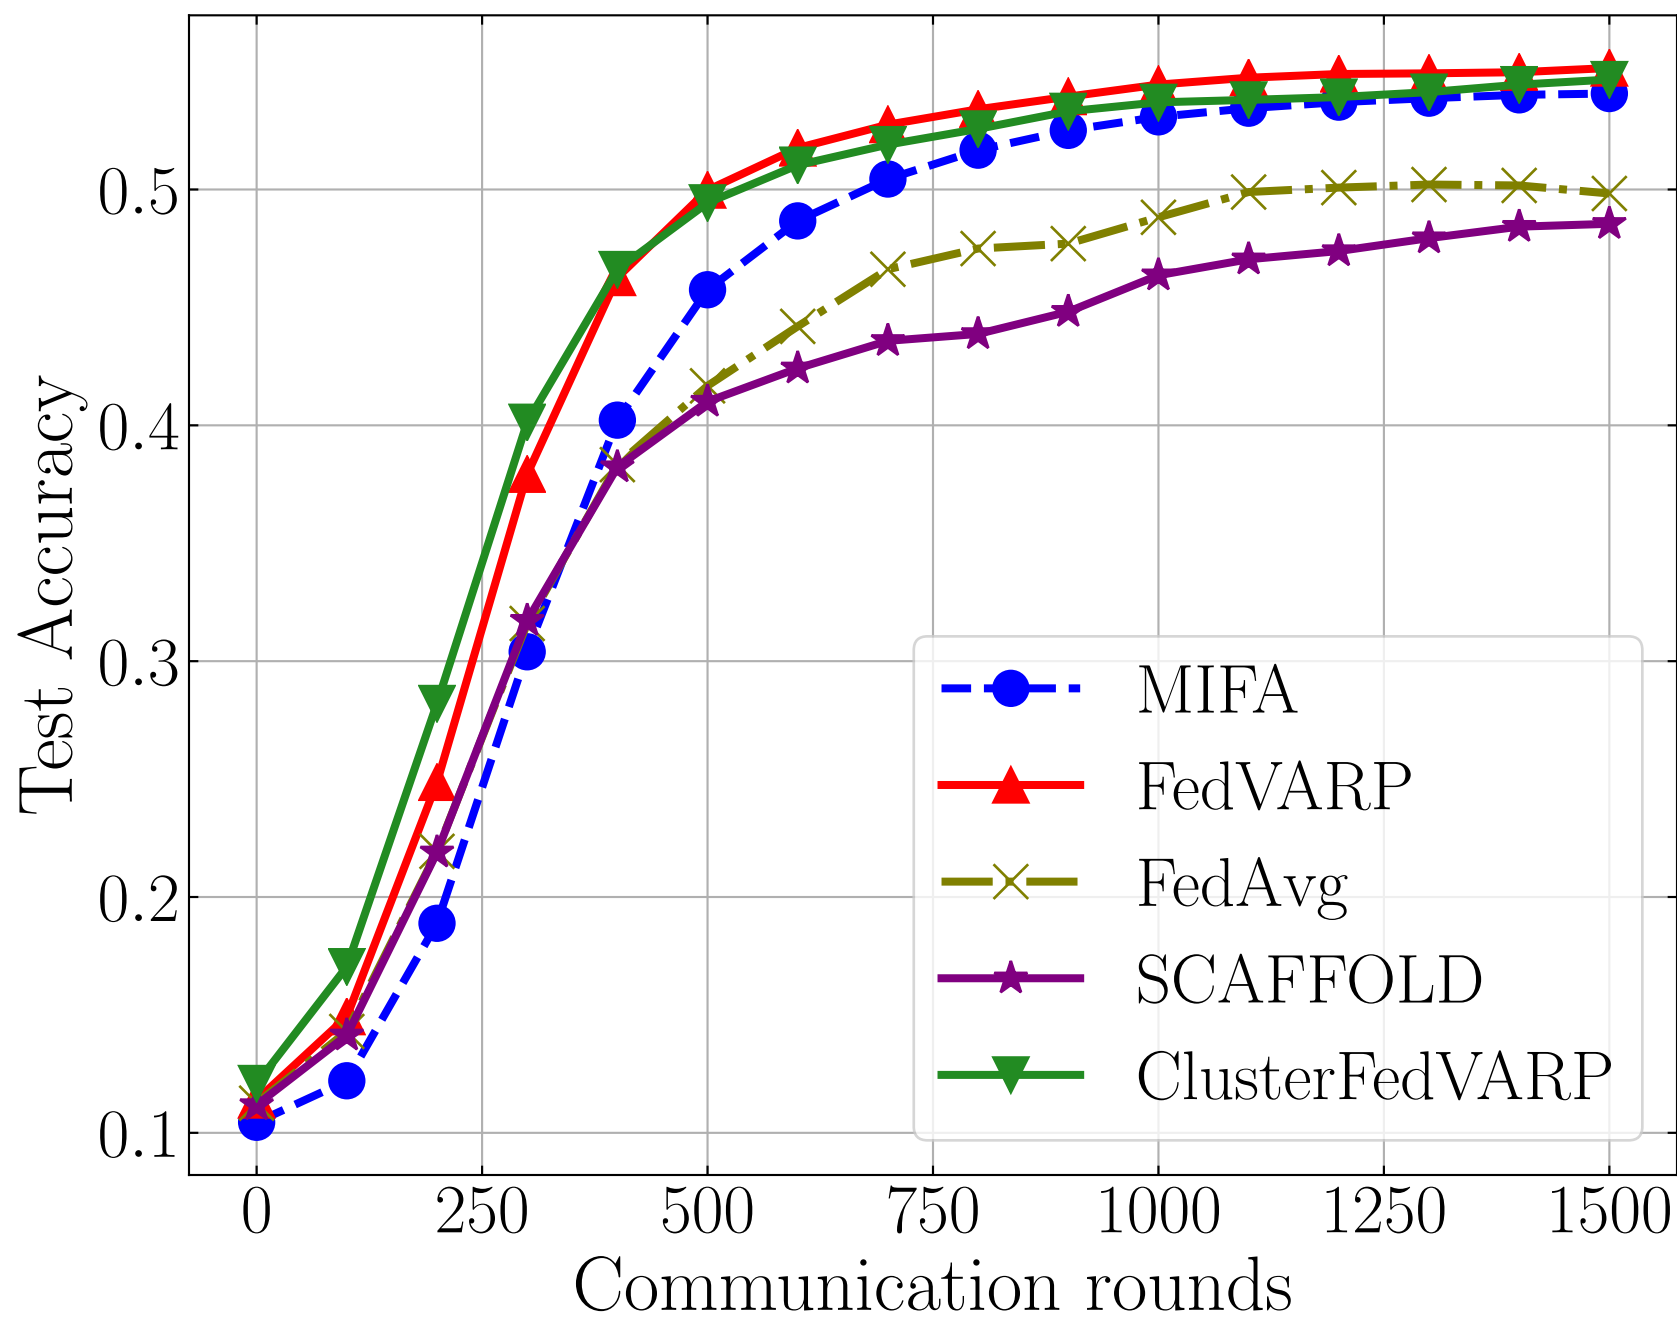

Supplement: supplementary_material [file attachment]

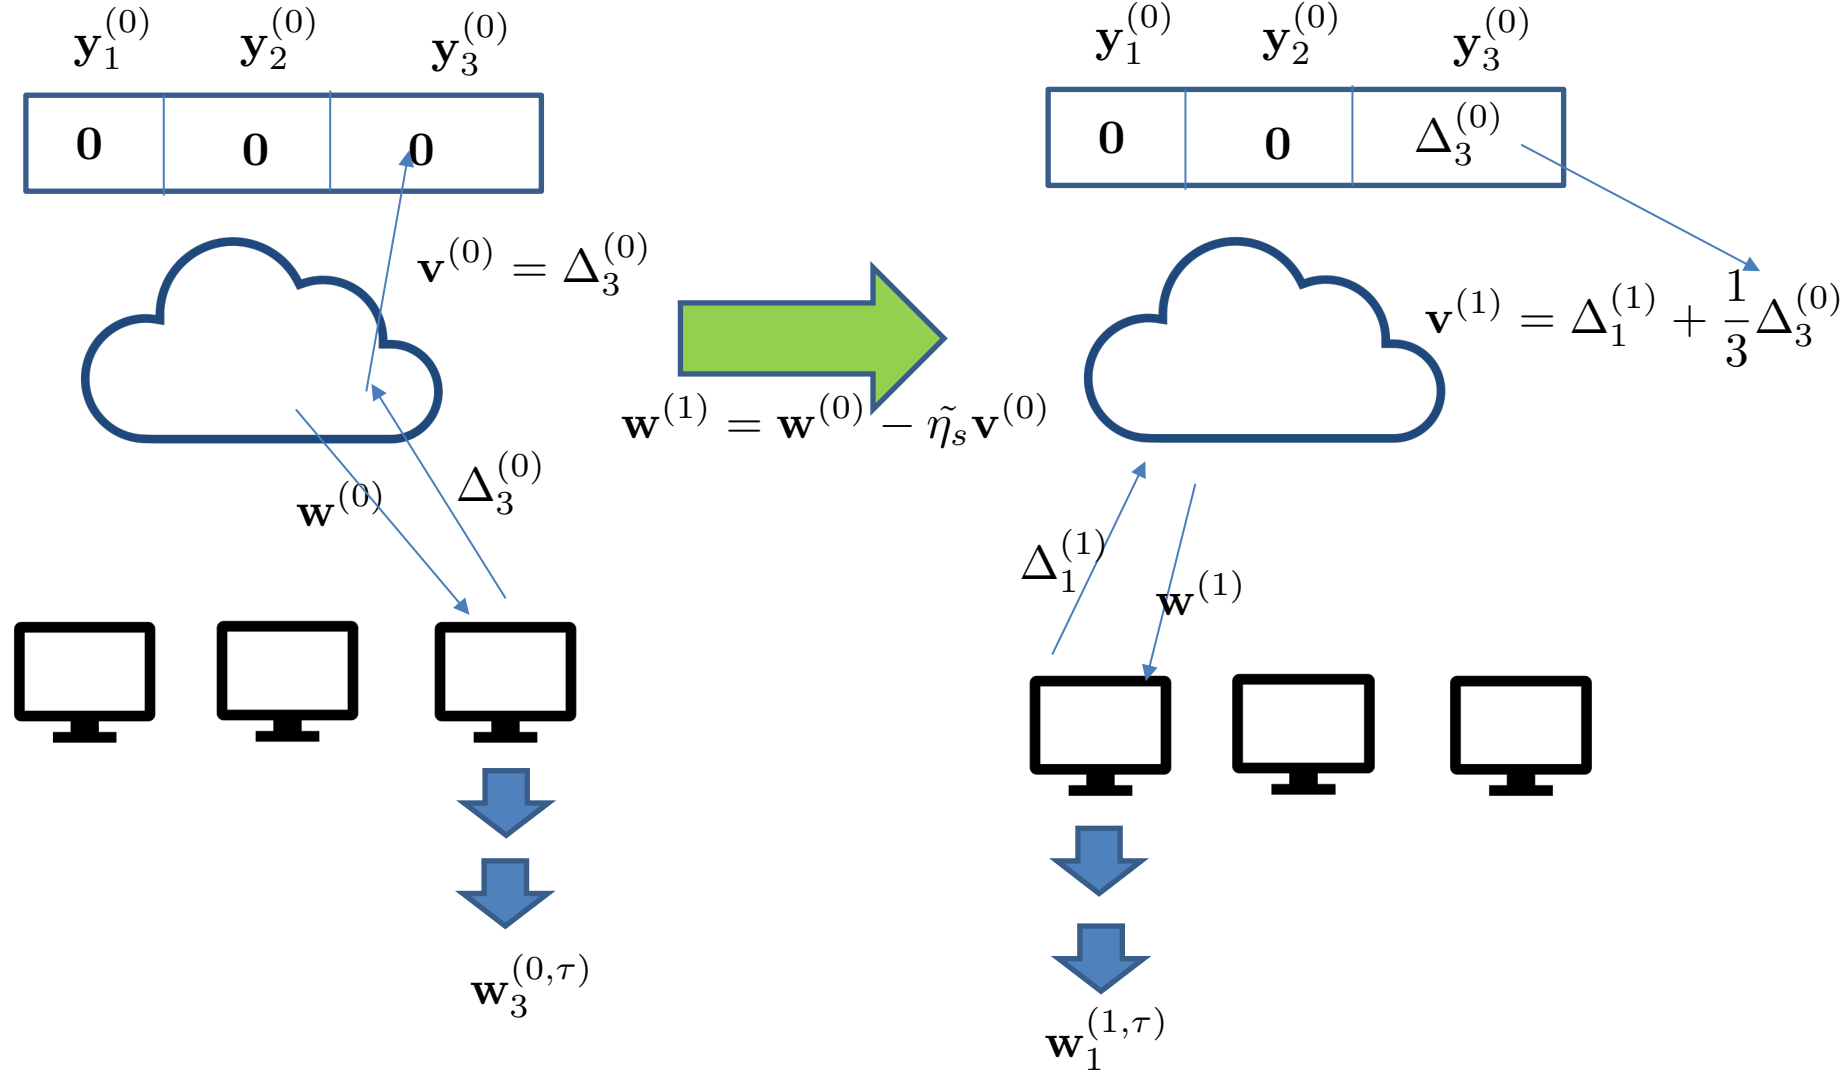

Supplement: supplementary_material [file attachment]

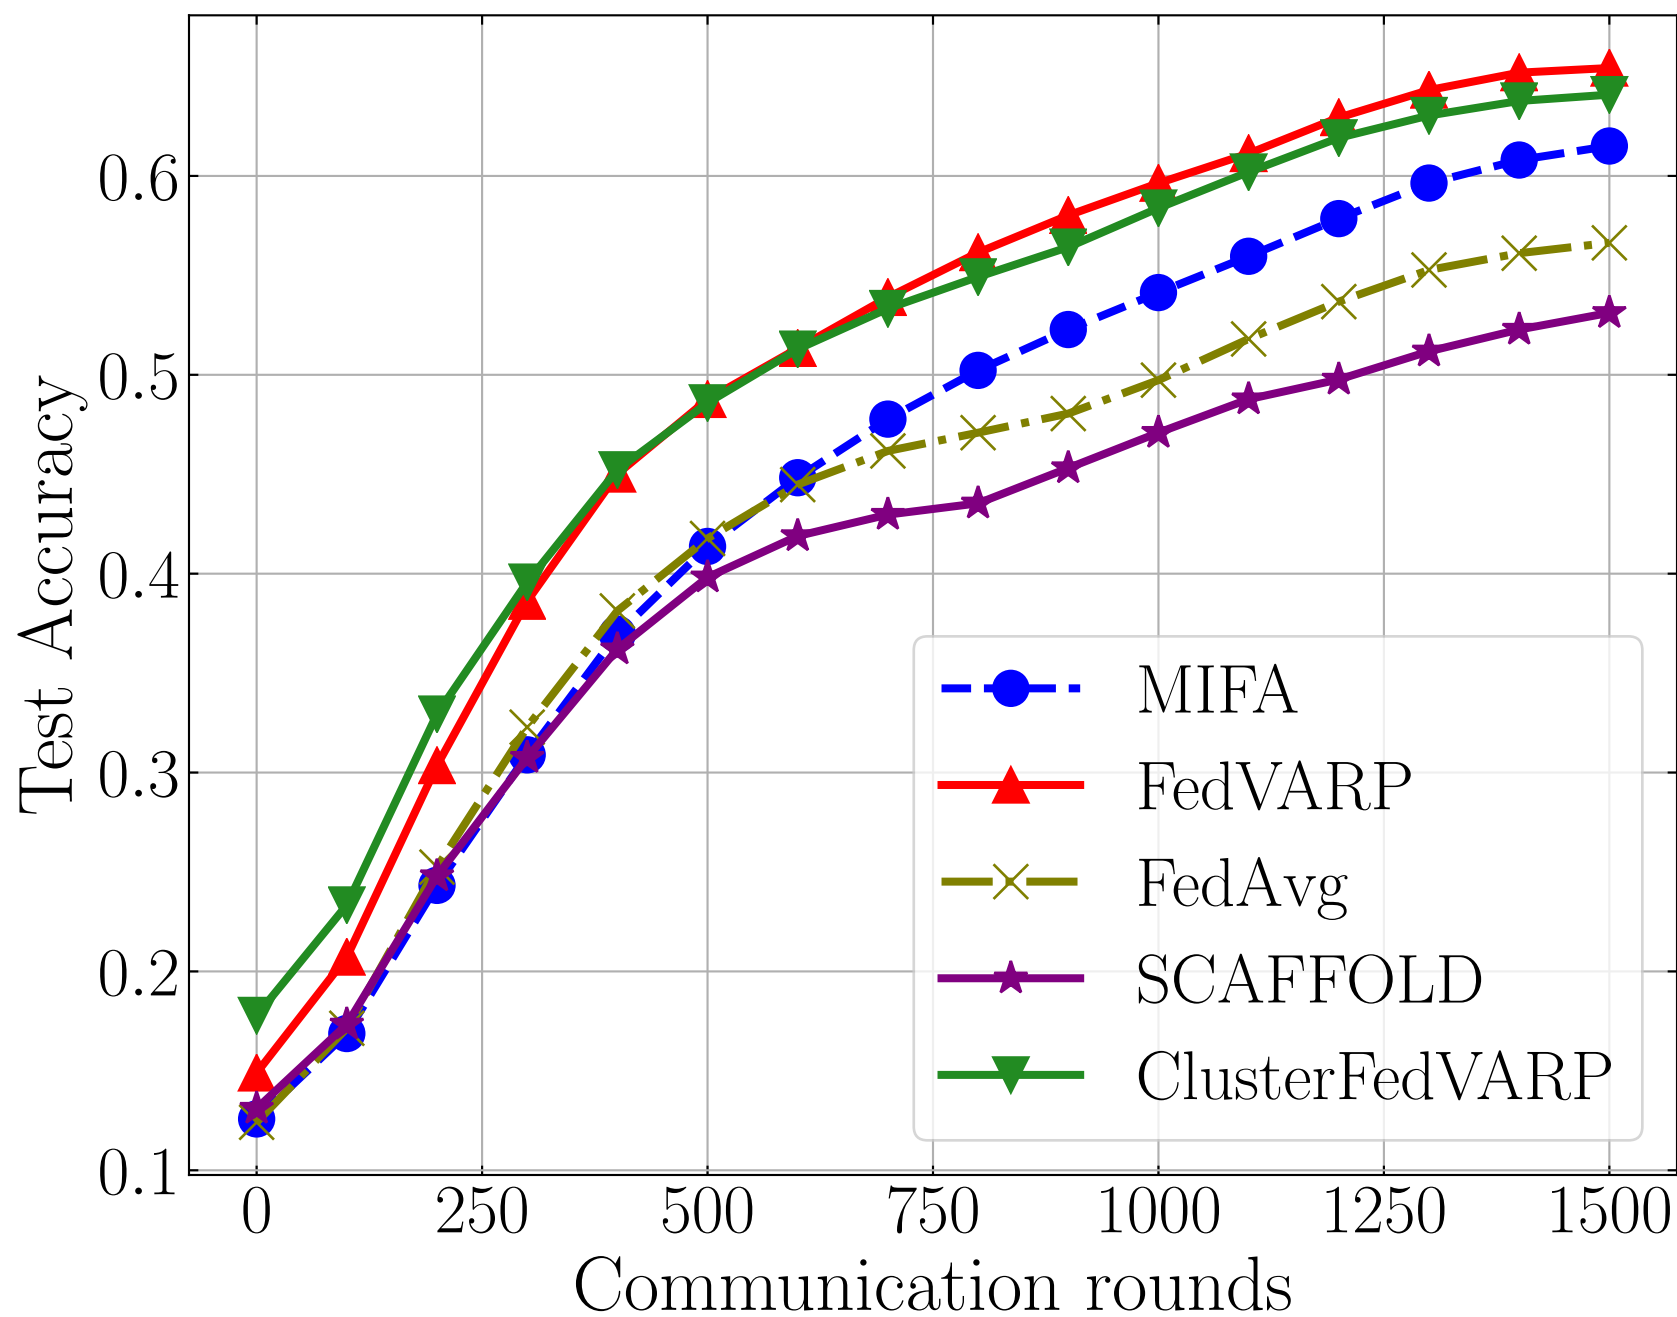

Supplement: supplementary_material [file attachment]
